# Supplementary material for: Switching biological functionalities of biointerfaces via dynamic covalent bonds
Source: Royal Society of Chemistry journal article supplement (doi:10.1039/c5tb02072g), 2015-12-17
Supplement: c5tb02072g1.pdf [file c5tb02072g1.pdf]

## Switching biological functionalities of biointerfaces via dynamic covalent bonds

Jie Deng,<sup>a</sup> Xinyue Liu,<sup>a</sup> Lang Ma,<sup>a</sup> Chong Cheng,<sup>\*,a,b</sup> Shudong Sun,<sup>a</sup> and Changsheng Zhao<sup>\*,a</sup>

<sup>a</sup> College of Polymer Science and Engineering, State Key Laboratory of Polymer Materials and Engineering, Sichuan University, Chengdu 610065, China

<sup>b</sup> Department of Chemistry and Biochemistry, Freie Universitat Berlin, Takustr. 3, 14195 Berlin, Germany

\* Corresponding author. Tel: +86-28-85400453, Fax: +86-28-85405402, E-mail:

(C. Cheng) sagecheng@163.com or chong.cheng@fu-berlin.de; (C.S. Zhao) zhaochsh70@163.com or zhaochsh70@scu.edu.cn

### Supporting information

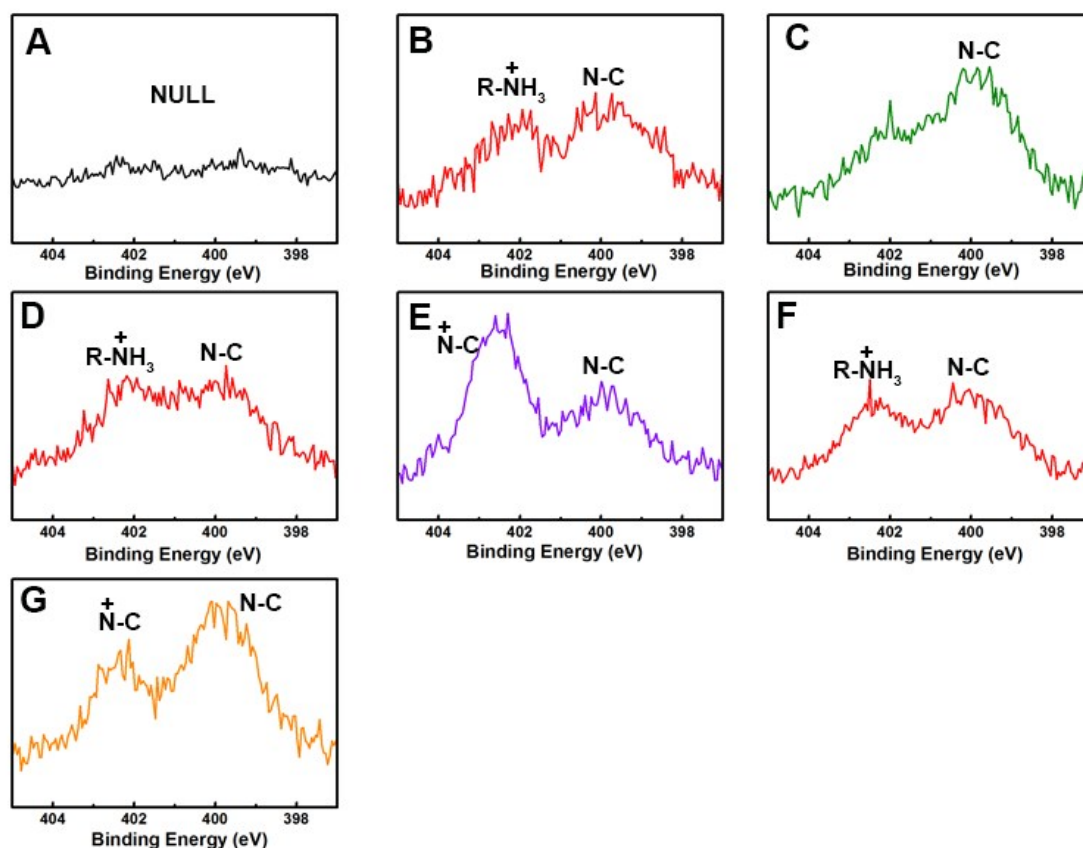

**Figure S1.** N 1s spectra of SW-GPS (A), SW-AD (B), SW-PSP (C), Ald-PSP detached surface (SW-DPSP, D), SW-PMT (E), Ald-PMT detached surface (SW-DPMT, F), and SW-PMP (G).

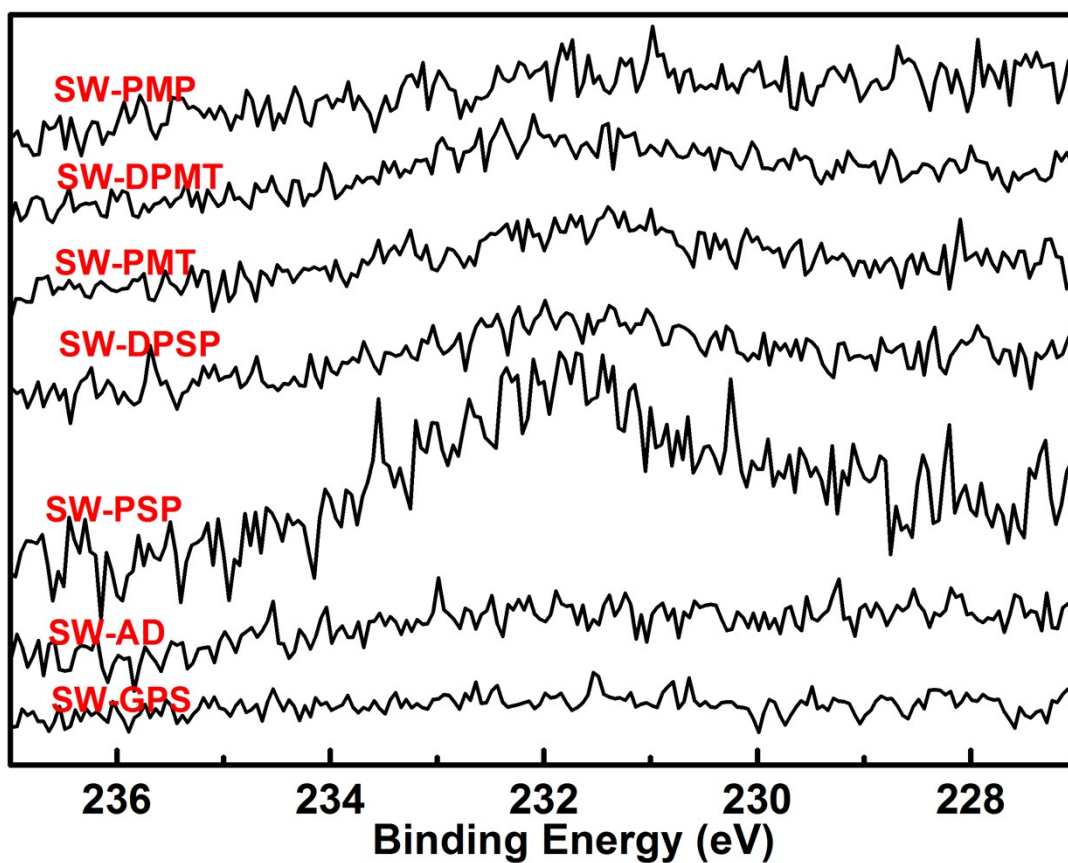

**Figure S2.** S 2s spectra of SW-GPS, SW-AD, SW-PSP, SW-DPSP, SW-PMT, SW-DPMT, and SW-PMP.

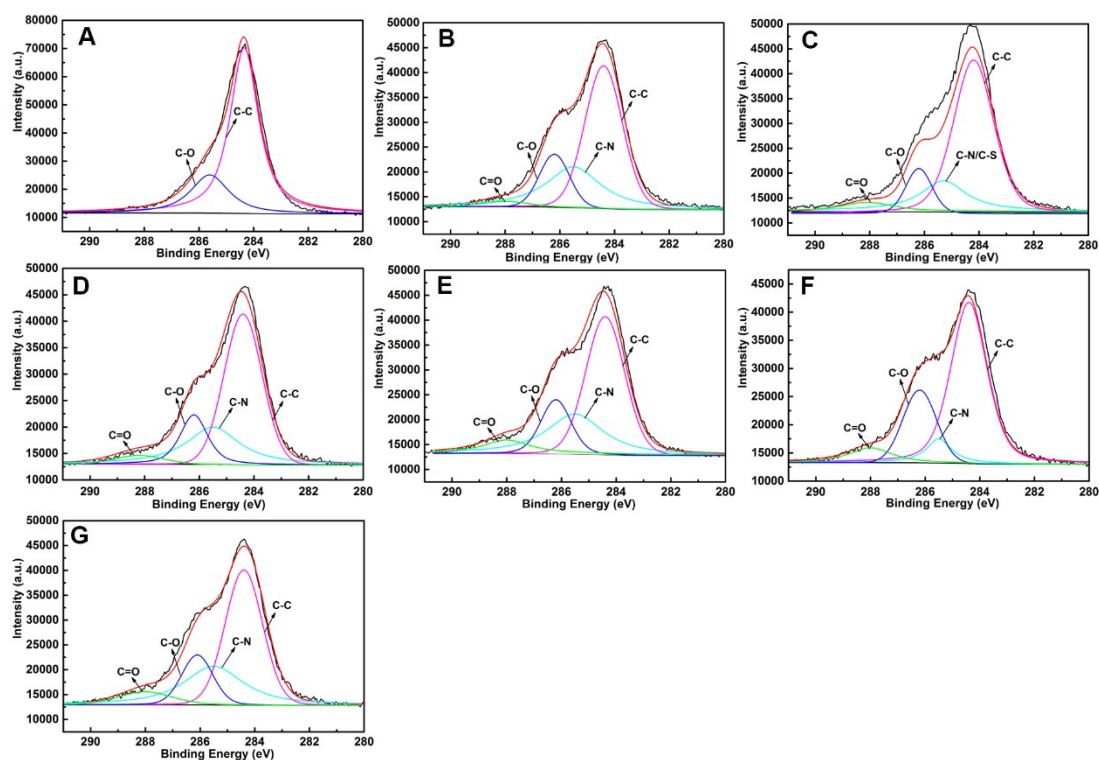

**Figure S3.** C 1s spectra of SW-GPS (A), SW-AD (B), SW-PSP (C), SW-DPSP (D),

SW-PMT (E), SW-DPMT (F), and SW-PMP (G).

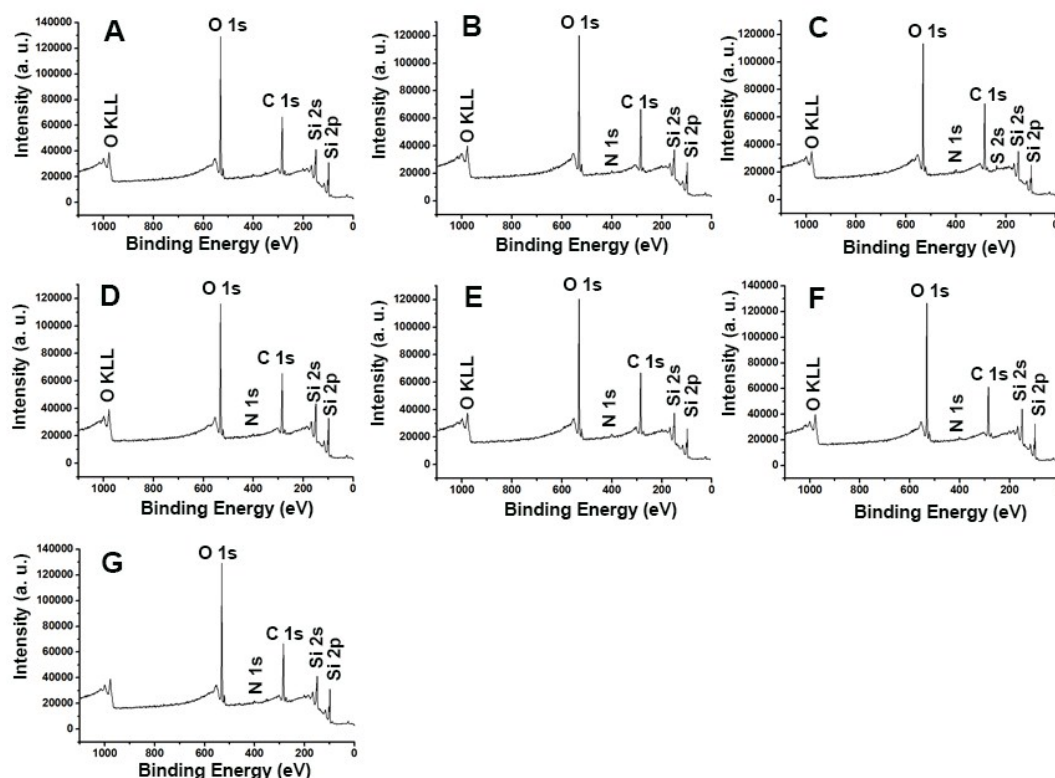

**Figure S4.** XPS wide spectra for all the substrates: SW-GPS (A), SW-AD (B), SW-PSP (C), SW-DPSP (D), SW-PMT (E), SW-DPMT (F), and SW-PMP (G).

**Table S1.** Elemental Compositions of SW-PSP and SW-DPSP determined by XPS Analysis.<sup>a</sup>

| % At Conc | O     | N     | C     | S      |
|-----------|-------|-------|-------|--------|
| SW-PSP    | 36.6  | 1.669 | 60.75 | 0.981  |
| SW-DPSP   | 40.62 | 1.985 | 57.35 | 0.0445 |

<sup>a</sup> Typically, we have evaluated the removal efficiency of Ald-polymer by removal of Ald-PSP. From the content of S element via XPS, it can be observed that over 95% of the Ald-PSP brushes have been removed by washing with an acidic solution.

**Table S2.** Molecular weight and polydispersity values for the Ald-polymers via Gel Permeation Chromatography (GPC, Pump: Waters 600E System Controller; Detector: Waters 410 Differential Refractometer). The GPC test is carried out with Ultrahydrogel 250 and Ultrahydrogel 500 columns at 40 °C, the flow rate is 1 mL/min, and water is used as an eluent. Calibration is made using standard poly(ethylene glycol) (for Ald-PMT) and polysaccharide (for Ald-PSP and Ald-PMP).

| Sample  | $M_n$ (GPC) (kDa) | $M_w$ (GPC) (kDa) | PDI   |
|---------|-------------------|-------------------|-------|
| Ald-PSP | 24.754            | 36.685            | 1.482 |
| Ald-PMT | 25.128            | 41.825            | 1.664 |
| Ald-PMP | 19.540            | 26.729            | 1.368 |

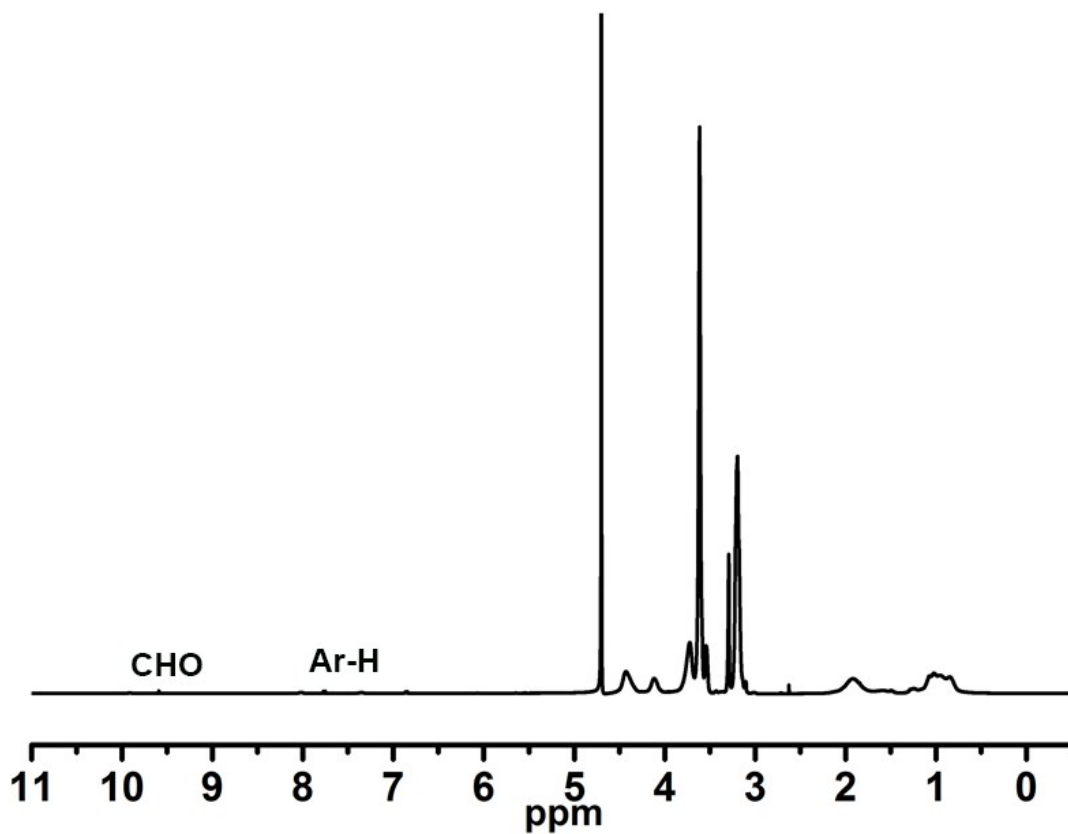

**Figure S5.** <sup>1</sup>H NMR spectrum of Ald-PMP. The signal at 9.6 ppm is assigned to aldehyde, which indicates that the aldehyde terminated PMP has been successfully synthesized.
